# Supplementary material for: Safety, patient acceptance and diagnostic accuracy of ultrasound core needle biopsy of parotid or submandibular glands in primary Sjögren’s syndrome with suspected salivary gland lymphoma
Source: HighWire-hosted journal article supplement (doi:10.1136/rmdopen-2021-001901), 2022-02-01
Supplement: rmdopen-2021-001901supp001_data_supplement.pdf [file rmdopen-2021-001901supp001_data_supplement.pdf]

| Suppl. table 1. Histopathological diagnoses                                                                                              |                                                                                         |
|------------------------------------------------------------------------------------------------------------------------------------------|-----------------------------------------------------------------------------------------|
| Patient 1                                                                                                                                | MALT lymphoma                                                                           |
| Patient 2                                                                                                                                | MALT lymphoma                                                                           |
| Patient 3                                                                                                                                | Focal sialadenitis                                                                      |
| Patient 4                                                                                                                                | Granulomatous sialadenitis consistent with sarcoidosis                                  |
| Patient 5                                                                                                                                | LESA                                                                                    |
| Patient 6                                                                                                                                | Focal sialadenitis                                                                      |
| Patient 7                                                                                                                                | Focal sialadenitis                                                                      |
| Patient 8                                                                                                                                | Diffuse sialadenitis                                                                    |
| Patient 9                                                                                                                                | MALT lymphoma                                                                           |
| Patient 10                                                                                                                               | IgG4-related disease                                                                    |
| Patient 11                                                                                                                               | Chronic sclerosing sialadenitis                                                         |
| Patient 12                                                                                                                               | MALT lymphoma                                                                           |
| Patient 13                                                                                                                               | MALT lymphoma                                                                           |
| Patient 14                                                                                                                               | MALT lymphoma                                                                           |
| Patient 15                                                                                                                               | Non diagnostic <sup>a</sup>                                                             |
| Patient 16                                                                                                                               | Chronic sialadenitis due to lithiasis                                                   |
| Patient 17                                                                                                                               | MALT lymphoma                                                                           |
| Patient 18                                                                                                                               | MALT lymphoma                                                                           |
| Patient 19                                                                                                                               | MALT lymphoma                                                                           |
| Patient 20                                                                                                                               | MALT lymphoma                                                                           |
| Patient 21                                                                                                                               | Focal lymphocytic sialadenitis with initial MALT acquisition                            |
| Patient 22                                                                                                                               | LESA                                                                                    |
| Patient 23                                                                                                                               | Lympho-epithelial cyst and focal lymphocytic sialadenitis with initial MALT acquisition |
| Patient 24                                                                                                                               | MALT lymphoma                                                                           |
| Patient 25                                                                                                                               | Focal sialadenitis                                                                      |
| Patient 26                                                                                                                               | MALT lymphoma                                                                           |
| Patient 27                                                                                                                               | MALT lymphoma                                                                           |
| Patient 28                                                                                                                               | LESA                                                                                    |
| Patient 29                                                                                                                               | MALT lymphoma                                                                           |
| Patient 30                                                                                                                               | Non diagnostic <sup>a</sup>                                                             |
| LESA: lymphoepithelial sialadenitis; MALT: mucosa-associated lymphoid tissue; <sup>a</sup> Inadequate material for diagnostic evaluation |                                                                                         |

## Suppl. Figure 1 : Post-biopsy complications questionnaire

**POST-BIOPSY COMPLICATIONS QUESTIONNAIRE**

- |                                                                      |       |    |
|----------------------------------------------------------------------|-------|----|
| 1. Did you have any swelling at biopsy site?                         | YES   | NO |
| If yes, how long?                                                    | ..... |    |
| Physician control                                                    | YES   | NO |
| <br>2. Did you have any hematoma at biopsy site?                     | YES   | NO |
| If yes, how long?                                                    | ..... |    |
| Physician control                                                    | YES   | NO |
| <br>3. Did you have any bleeding at biopsy site?                     | YES   | NO |
| If yes, how long?                                                    | ..... |    |
| Physician control                                                    | YES   | NO |
| <br>4. Did you have pain at biopsy site during the procedure?        | YES   | NO |
| If yes, choose a number from 0 to 10 to describe pain intensity      | ..... |    |
| <br>5. Did you have pain at biopsy site after the procedure?         | YES   | NO |
| If yes, choose a number from 0 to 10 to describe pain intensity      | ..... |    |
| If yes, how long? (days)                                             | ..... |    |
| Did you take any painkiller/analgesic?                               | YES   | NO |
| <br>5. Did you have any local infection?                             | YES   | NO |
| Physician control                                                    | YES   | NO |
| <br>6. Did you have any anesthesia / paresthesia in the biopsy area? | YES   | NO |
| If yes, how long?                                                    | ..... |    |
| Physician control                                                    | YES   | NO |
| <br>7. Did you have any sialocele or fistula in the biopsy area?     | YES   | NO |
| Physician control                                                    | YES   | NO |
